# Supplementary material for: Extracellular Vesicles of COVID-19 Patients Reflect Inflammation, Thrombogenicity, and Disease Severity
Source: Int J Mol Sci. 2023 Mar 21;24(6):5918. doi: 10.3390/ijms24065918 (PMC10054500; doi:10.3390/ijms24065918)
Supplement: Supplementary file 1 [file ijms-24-05918-s001.zip › ijms-2217026-supplementary.pdf]

## Supplementary Methods

### Supplementary method (SM)

**SM1. Nano tracking analysis (NTA)** was performed using NS300 Automated Nanoparticle Characterization Instrument (Malvern Instruments LTD Worcestershire Malvern ,UK),. Software Version build 3.1.54., Camera Type—sCMOS, Laser Module: NS300, 405 nm). Software settings for analysis were kept constant for all measurements. Capture settings were as follows: camera level = 7, slider shutter = 1232, slider gain = 219, number of frames = 749, temperature = 25°C, viscosity = 0.86 cP, and syringe pump speed = 20. Five 30 s videos were recorded per sample in light scatter. Samples were diluted with phosphate buffered saline (PBS) filtered through a 0.1  $\mu$ m membrane. The filtered PBS served as control for each measurement

**SM2. Western blot (WB) analysis:** A sample of 30ul of EV pellets obtained from similar PPP volume (250ul) were combined with 2X-lysis buffer (Ray Biotech, Norcross, GA, USA) supplemented with 1% proteinase inhibitor and 1% phosphatase inhibitors (Sigma) containing  $\beta$ -mercaptoethanol (1:20, Biorad) (12). Samples were loaded and separated on 4-20% Mini-PROTEAN TGX Precast Protein Gels (Bio-Rad) and then transferred to Trans-Blot Turbo Mini 0.2  $\mu$ m Nitrocellulose Transfer Packs (Bio-Rad). The transferred membranes were incubated with specific antibodies (supplementary Table 1), documented by myECL™ Imager and analyzed by My Image Analysis Software (both from Thermo Fisher Scientific, Waltham, MA USA).

## Supplementary figures and tables

### Supplementary Table SM1 Antibodies and labeling kits

| Antibodies for flow cytometry                                  | Color    | Vender    | Cat. number |
|----------------------------------------------------------------|----------|-----------|-------------|
| Mega mix beads 0.5,0.9,3um                                     | FITC     | BIOCYTEX  | 7801        |
| IgG                                                            | FITC     | BD        | 345815      |
| IgG                                                            | PE       | BD        | 400112      |
| IgG                                                            | APC      | BD        | 555751      |
| Anti-CD235a (red blood cells)                                  | PE       | Dako      | R7078       |
| Anti-CD41a (platelet)                                          | APC      | BD        | 559777      |
| Anti-CD62P (activated platelets)                               | PE       | BD        | 555524      |
| Anti-CD62E (endothelial cells)                                 | APC      | BD        | 551144      |
| Anti-CD 144 (endothelial cells)                                | APC      | Biolegend | B259463     |
| Anti-CD31 (endothelial cells & platelets)                      | FITC     | BD        | 555445      |
| Anti-CD201 (endothelial protein C receptor (EPCR), coagulation | APC      | BD        | 563622      |
| Anti-CD142 (tissue factor, coagulation)                        | PE       | BD        | 550312      |
| Anti-CD141 (thrombomodulin, coagulation)                       | APC      | BD        | 564123      |
| Anti-HLADR (MHC class II)                                      | APC      | BD        | 559868      |
| Anti-CD11a (mediate leukocyte adhesion)                        | PE       | BD        | 555384      |
| Anti-CD 14 (monocyte, inflammation)                            | FITC-FL1 | BD        | 555397      |
| Anti-CD4 (T cells)                                             | APC      | BD        | 555349      |
| Anti-CD8 (T-cell receptor (TCR)                                | APC      | BD        | 566852      |
| Anti-CD28 (T-cell activation)                                  | APC      | BD        | 559770      |

| Anti-CD22, B lymphocyte-specific adhesion molecule | PE            | BD         | 337899         |
|----------------------------------------------------|---------------|------------|----------------|
| Antibodies and kits for Western blot               | Concentration | Vender     | Cat. number    |
| Anti-CD63                                          | 1:1000        | abcam      | ab59479        |
| Anti-CD81                                          | 1:1000        | abcam      | ab79559        |
| Anti-interferon gamma (INF $\gamma$ )              | 1:1000        | abcam      | ab133566       |
| Anti-TNF alpha                                     | 1:1000        | abcam      | ab215188       |
| Anti-IL-2                                          | 1:1000        | abcam      | ab9238         |
| Anti-IL-6                                          | 1:500         | abcam      | ab9324         |
| Anti-IL-17                                         | 1:1000        | abcam      | ab79056        |
| Anti-TGF $\beta$                                   | 1:1000        | abcam      | ab215715       |
| Anti-actin                                         | 1:1000        | Biomedical | 691001MP       |
| Anti-mouse                                         | 1:5000        | Jackson    | 115-035-146    |
| Anti-rabbit                                        | 1:5000        | Jackson    | 111-035-144    |
| WESTAR NOVA 2.0 chemiluminescent substrate for WB  |               | CYANAGR    | 9470XLS0710250 |

\* PPP samples were diluted 1:5 with filtered PBS (by 0.1um), labeled with double or single fluorescent antibodies for 30 min in the dark and ending with the adding of FACS buffer (PBS with 0.5% PFA).

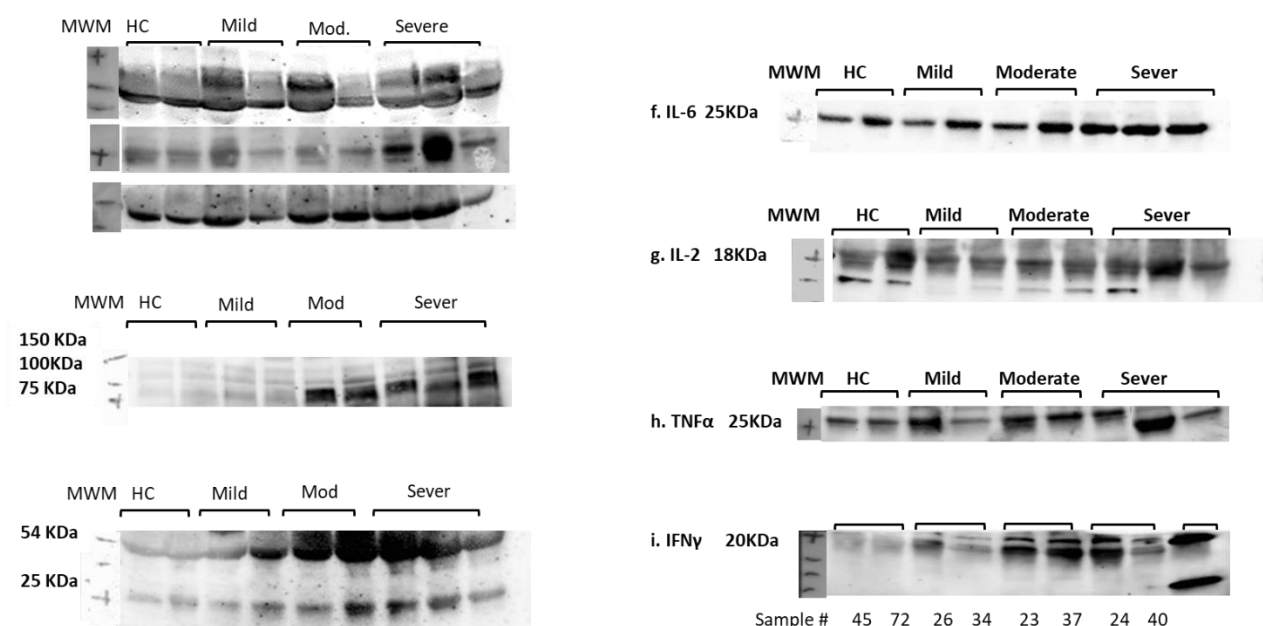

**Supplementary figure SM1: Western blot gel images**

A representative Western blot image showing the expression of selected proteins in the EV pellet samples of the HCs and the COVID-19 patients. CD81, exosome markers (a), actin protein serves as control (b), ACE and TMPRS SARS-CoV-2 virus entry proteins (c,d). Cytokine content: IL-6 (e), IFN $\gamma$  (f) TNF $\alpha$  (g), and IL-2 (h).

Supplementary figure SM2: Flow cytometer analysis of patient subgroups and healthy control samples

Megamix Beads  
size and  
antibodies

Healthy Control

COVID-19 patients:  
Mild

Moderate

Severe

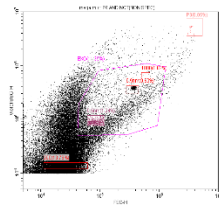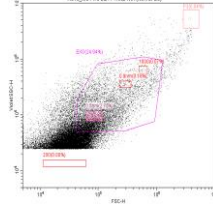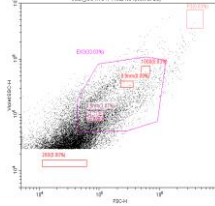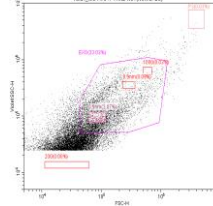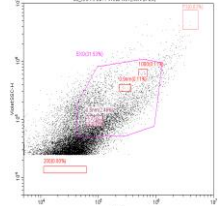

IgG FITC

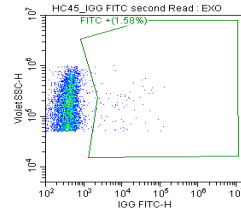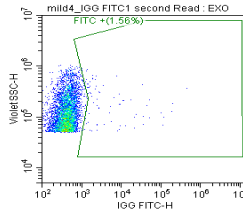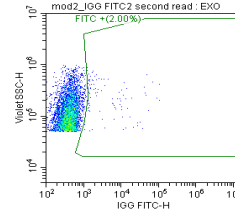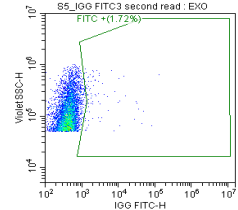

IgG PE

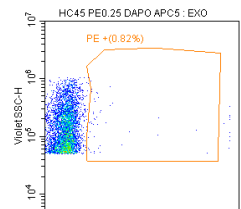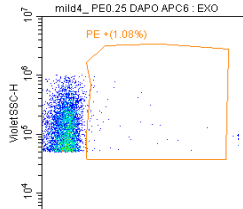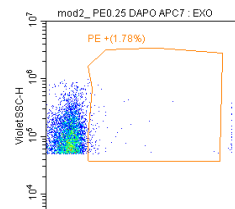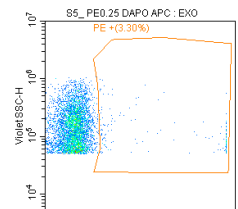

IgG APC

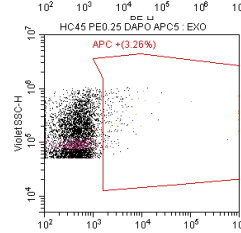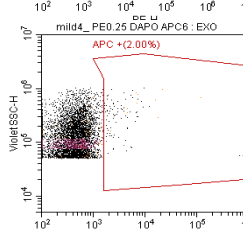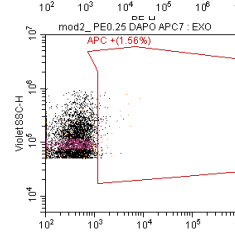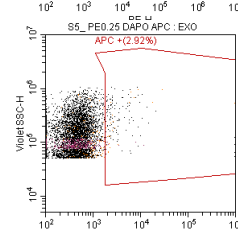

CD253

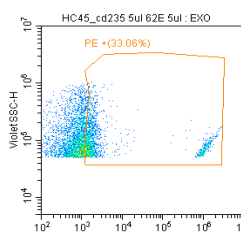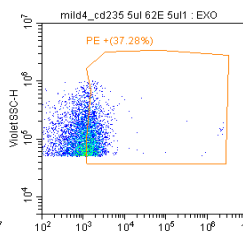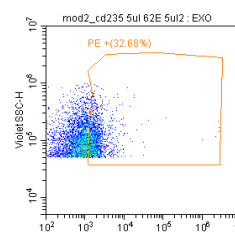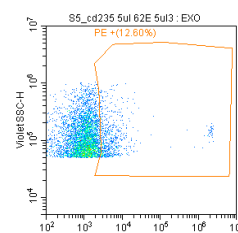

CD 144

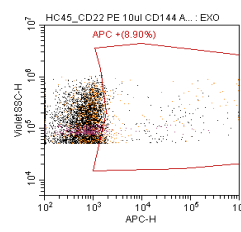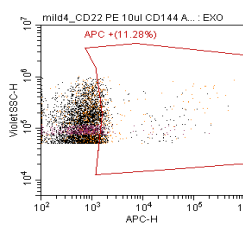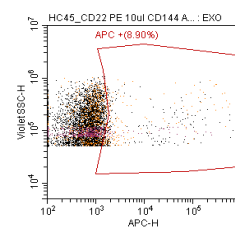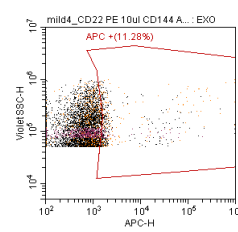

CD62e

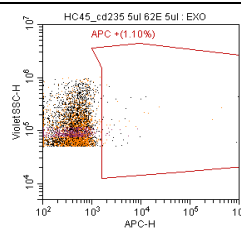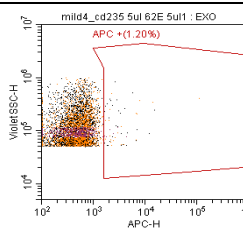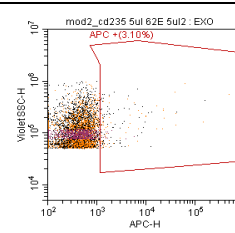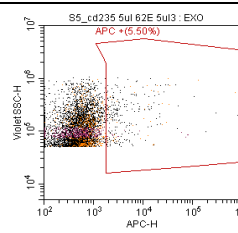

CD41

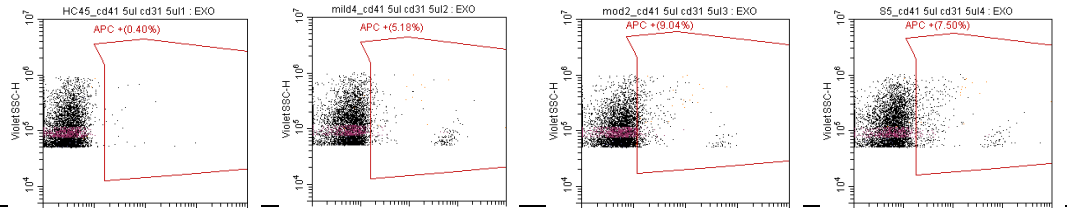

CD62P

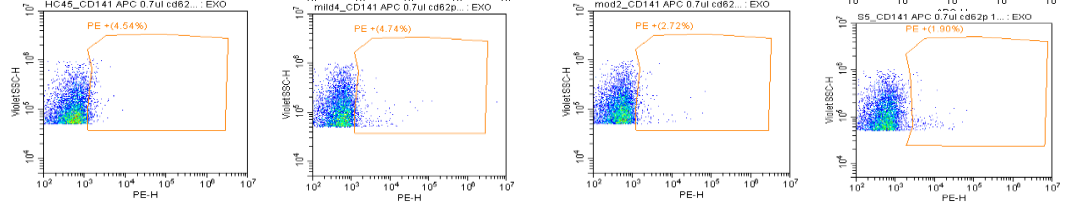

CD31

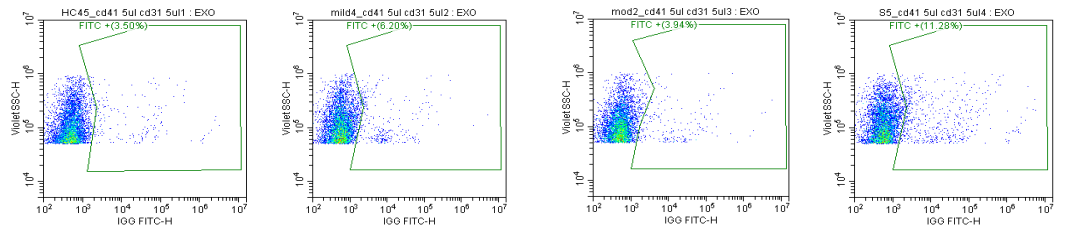

CD142

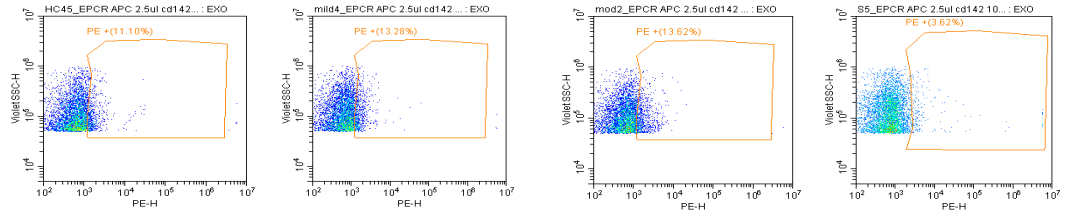

CD141

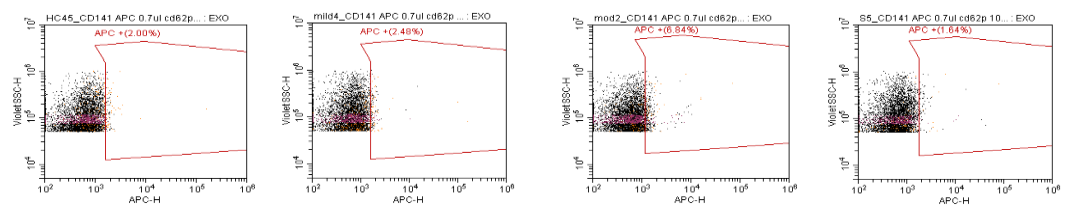

EPCR

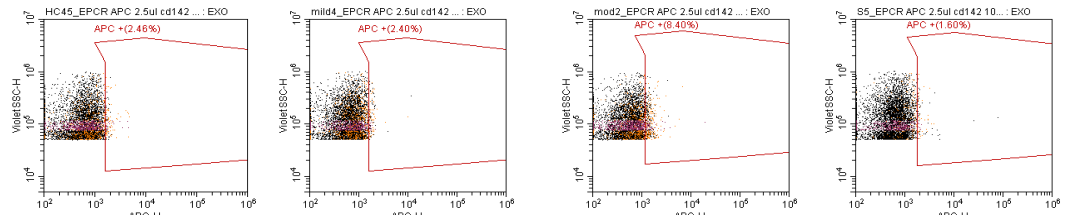

CD4

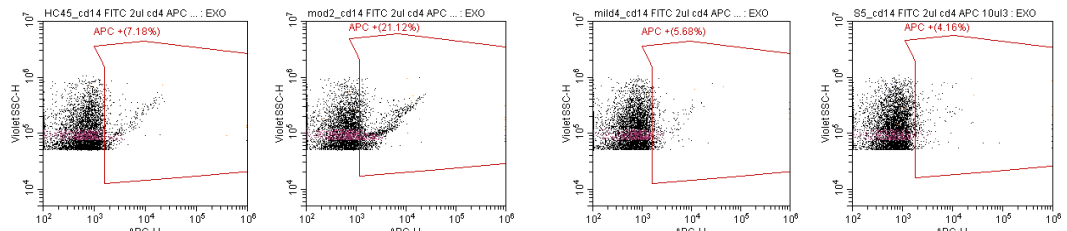

CD8

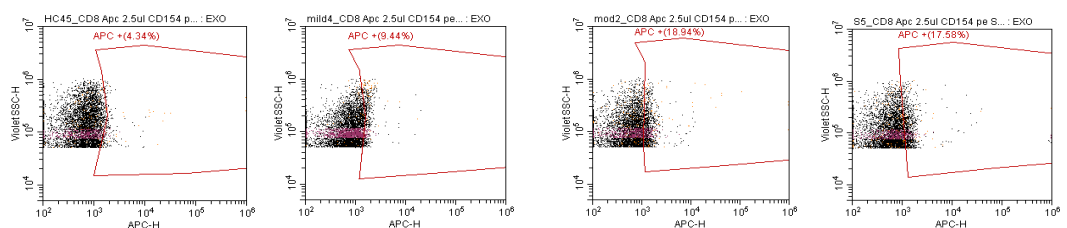

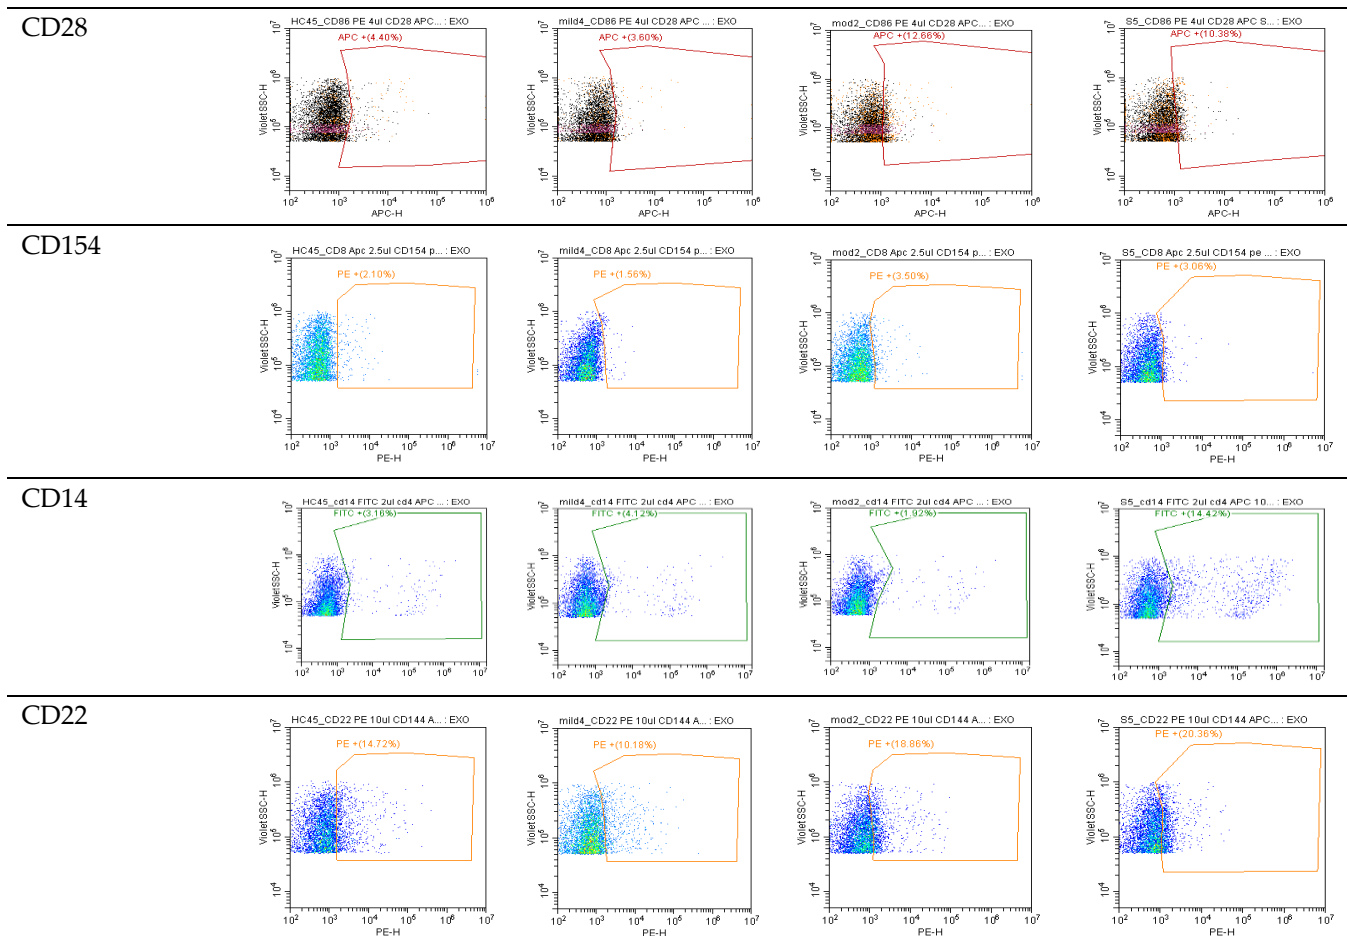

**Supplementary figure SM2: Flow cytometer analysis of patient subgroups and healthy control samples**

EV gates were set using Megamix, a mix of fluorescent beads (bead size 0.3/0.9/3 $\mu$ m) (a). EV distribution and membrane antigen levels were assessed by flow cytometry using fluorescent antibodies. Representative images of flow cytometer analysis of EVs obtained from the study cohorts, healthy control and COVID-19 patients (mild, moderate, and severe) labeled with isotype controls antibodies (IgG FITC, PE, APC) and fluorescent antibodies against red blood cells (CD253), endothelial markers (CD144, CD62E), platelet and activated platelet marker (CD41, CD62P), coagulation markers: tissue factor (CD142), thrombomodulin (CD141) and endothelial protein C receptor (EPCR), and immune cells markers (CD4, CD8, CD28, CD154, CD14, CD22).
